# Supplementary material for: Spontaneous macroscopic carbon nanotube alignment via colloidal suspension in hexagonal columnar lyotropic liquid crystals
Source: Royal Society of Chemistry journal article supplement (doi:10.1039/b715683a), 2008-01-01
Supplement: b715683a.pdf [file b715683a.pdf]

On-line supporting information for *Spontaneous macroscopic carbon nanotube alignment via colloidal suspension in hexagonal columnar lyotropic liquid crystals* (Scalia, von Böhler, Hägele, Roth, Giesselmann and Lagerwall)

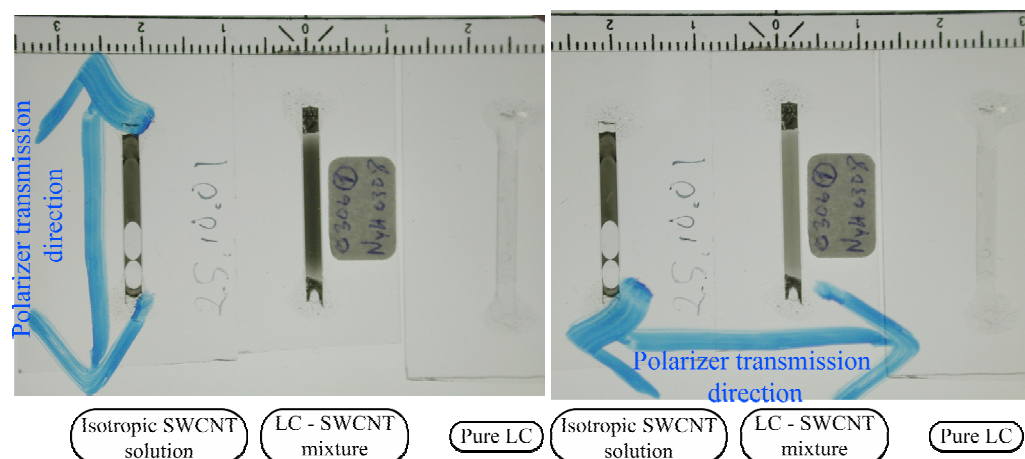

**Supplementary Figure 1.** Three capillaries filled with an isotropic SWCNT suspension, LC-aligned SWCNTs, and CNT-free LC, respectively (left to right), next to each other, underneath a linear polariser held with its transmission direction parallel (left photo) and perpendicular (right photo) to the capillary axes, respectively. Only the sample with LC-aligned SWCNTs changes its appearance, reflecting the alignment of the SWCNTs along the capillary axis.

**Supplementary Video 1. Liquid crystal carbon nanotube polariser** (movie file

Video1.mov). Part 1: the LC-aligned SWCNTs in a 200  $\mu\text{m}$  thick capillary observed in a microscope as it is illuminated by horizontally polarised light and slowly rotated. Part 2: the same capillary illuminated by unpolarised light and observed through a linear polariser which is rotated from transmission direction parallel to the capillary to perpendicular, and back.
